# Supplementary material for: Nickel sulfide nanospheres anchored on reduced graphene oxide in situ doped with sulfur as a high performance anode for sodium-ion batteries
Source: Royal Society of Chemistry journal article supplement (doi:10.1039/c7ta02194a), 2017-01-01
Supplement: c7ta02194a1.pdf [file c7ta02194a1.pdf]

## Supporting Information

**Title:** Nickel Sulfide Nanospheres Anchored on Reduced Graphene Oxide *in-situ* Doped with Sulfur as High Performance Anode for Sodium-ion Batteries

Hongwei Tao, Min Zhou\*, Kangli Wang\*, Shijie Cheng and Kai Jiang\*

### 1. Elemental composition information of the NiS<sub>x</sub>-rGOS-1, NiS<sub>x</sub>-rGOS-2 and NiS<sub>x</sub>-rGOS-3

Table S1 Elemental composition information of the NiS<sub>x</sub>-rGOS-1, NiS<sub>x</sub>-rGOS-2 and NiS<sub>x</sub>-rGOS-3

| Sample                   | C(wt%) | S(wt%) | H(wt%) |
|--------------------------|--------|--------|--------|
| NiS <sub>x</sub> -rGOS-1 | 26.7   | 25.2   | 0.9    |
| NiS <sub>x</sub> -rGOS-2 | 43.9   | 22.0   | 1.6    |
| NiS <sub>x</sub> -rGOS-3 | 64.9   | 12.0   | 2.2    |

### 2. XRD patterns of NiS<sub>x</sub>, NiS<sub>x</sub>-rGOS-1, NiS<sub>x</sub>-rGOS-2 and NiS<sub>x</sub>-rGOS-3 before calcination

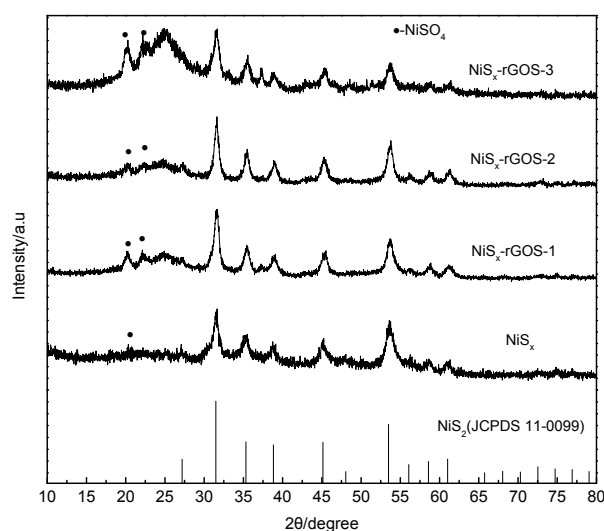

Fig. S1 XRD patterns of NiS<sub>x</sub>, NiS<sub>x</sub>-rGOS-1, NiS<sub>x</sub>-rGOS-2 and NiS<sub>x</sub>-rGOS-3 before calcination

### 3. FT-IR and Raman spectras of rGO.

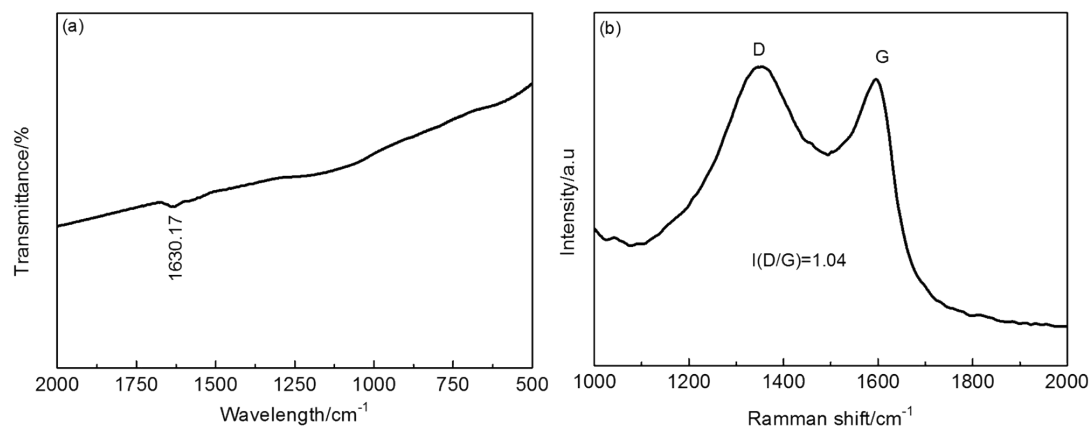

Fig. S2 FT-IR (a) and Raman (b) spectras of rGO.

### 4. Raman spectras of GO, NiS<sub>x</sub>, NiS<sub>x</sub>-rGOS-1, NiS<sub>x</sub>-rGOS-2 and NiS<sub>x</sub>-rGOS-3

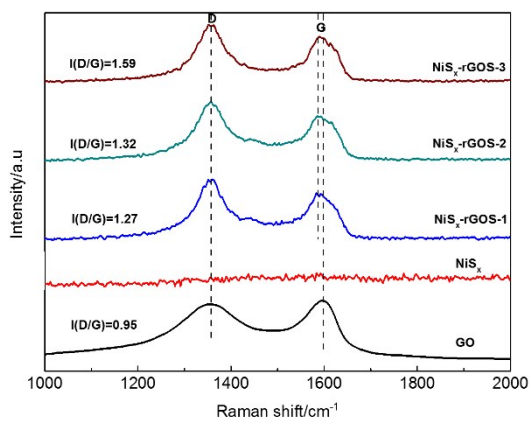

Fig. S3 Raman spectras of GO, NiS<sub>x</sub>, NiS<sub>x</sub>-rGOS-1, NiS<sub>x</sub>-rGOS-2 and NiS<sub>x</sub>-rGOS-3

## 5. X-ray photoelectron spectroscopic (XPS) spectra of NiS<sub>x</sub>-rGOS.

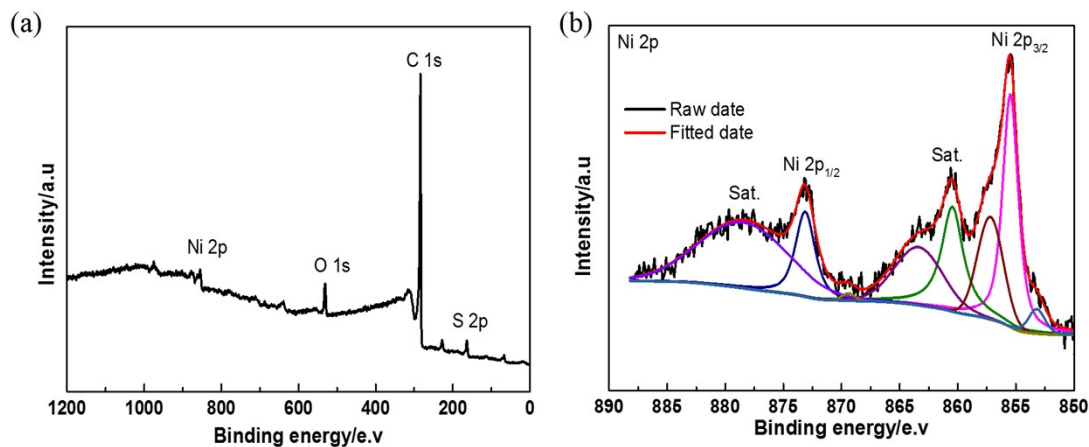

Fig. S4 Typical XPS spectra of the NiS<sub>x</sub>-rGOS-1 composite: (a) survey spectra, (b) Ni 2p region XPS spectrum

## 6. N<sub>2</sub> adsorption–desorption isotherm of the as prepared NiS<sub>x</sub>, NiS<sub>x</sub>-rGOS-1, NiS<sub>x</sub>-rGOS-2 and NiS<sub>x</sub>-rGOS-3

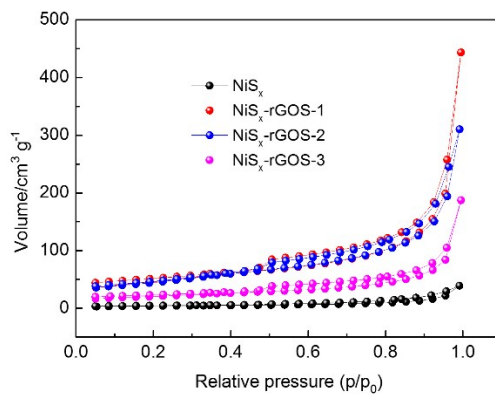

Fig. S5 N<sub>2</sub> adsorption–desorption isotherm of the as prepared NiS<sub>x</sub>, NiS<sub>x</sub>-rGOS-1, NiS<sub>x</sub>-rGOS-2 and NiS<sub>x</sub>-rGOS-3

**7. SEM images of NiS<sub>x</sub>, NiS<sub>x</sub>-rGOS-1, NiS<sub>x</sub>-rGOS-2 and NiS<sub>x</sub>-rGOS-3 before calcination.**

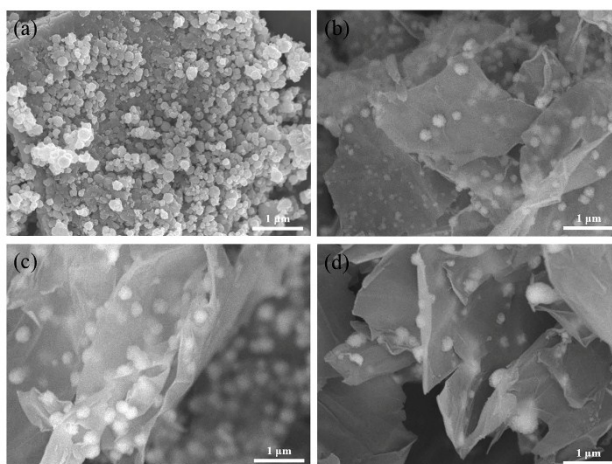

Fig. S6 SEM images of NiS<sub>x</sub> (a), NiS<sub>x</sub>-rGOS-1(b), NiS<sub>x</sub>-rGOS-2 (c) and NiS<sub>x</sub>-rGOS-3 (d) before calcination.

**8. TEM and HRTEM images of NiS<sub>x</sub>-rGOS-2 and NiS<sub>x</sub>-rGOS-3**

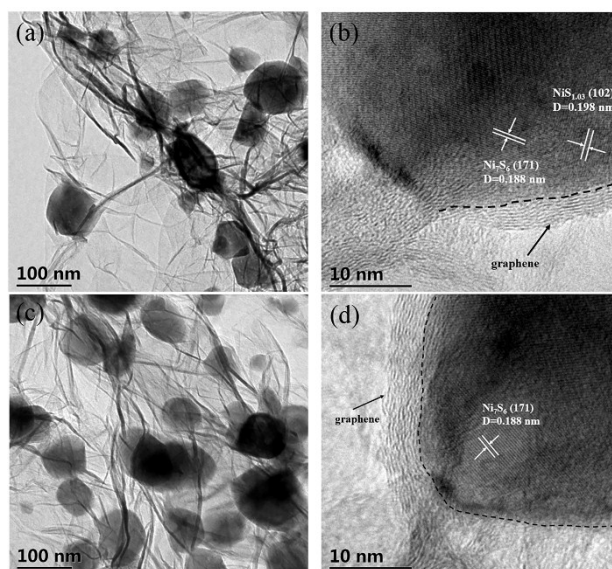

Fig. S7 TEM and HRTEM images of NiS<sub>x</sub>-rGOS-2 (a-b) and NiS<sub>x</sub>-rGOS-3 (c-d).

## 9. CV curves of rGOS.

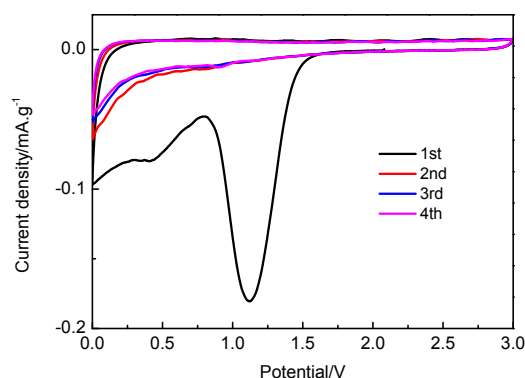

Fig. S8 CV curves of rGOS.

In Fig.S8, during the first cathodic sweep, the irreversible peak at 1.1V is attributed to the side reactions of the function groups on the surface of the rGO, and the cathodic peak at 0.6 V is assigned to the decomposition of the electrolyte to form a solid-electrolyte interface (SEI). In the subsequent scans, a pair of redox peaks at  $\sim 0.1$  V can be ascribed to the reversible insertion/extraction of Na<sup>+</sup> into/from the rGO. Based on the CV curves of the rGO, the redox peaks near 0.1 V for the NiS<sub>x</sub>-rGOS-3 can be ascribed to the insertion/extraction of Na<sup>+</sup> of the rGOS.

## 10. Electrochemical performances of rGO and rGOS

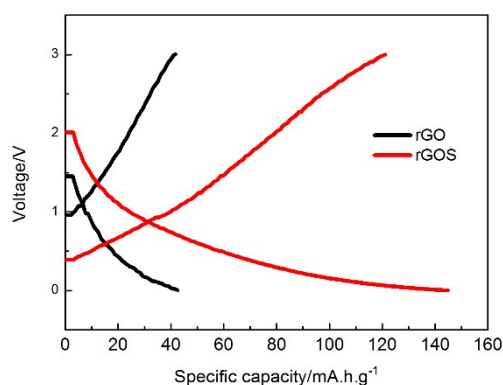

Fig. S9 Charge-discharge profiles for the rGO and rGOS at the current density of 0.2 A g<sup>-1</sup>.

As shown in Fig.S9, the rGOS electrode exhibit a high reversible capacity of 134 mAh g<sup>-1</sup> at the current densities of 0.2 A g<sup>-1</sup> due to the sulfur doped into rGO. For comparison, the rGO electrode only delivery a capacity of 43 mAh g<sup>-1</sup>.

## 11. S 2p XPS spectra of the cycled $\text{NiS}_x\text{-rGOS-1}$ electrode.

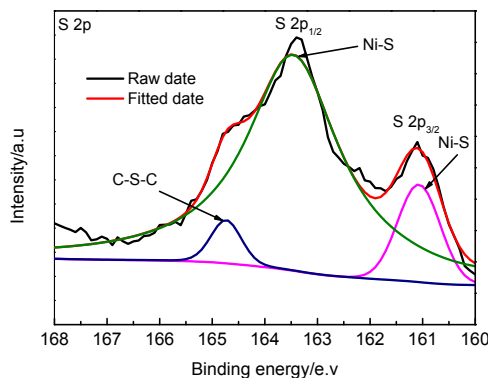

Fig. S10 S 2p XPS spectra of the cycled  $\text{NiS}_x\text{-rGOS-1}$  electrode.

## 12. Raw and fitting electrochemical impedance spectra (EIS) of the $\text{NiS}_x$ and $\text{NiS}_x\text{-rGOS}$ electrode after cycling

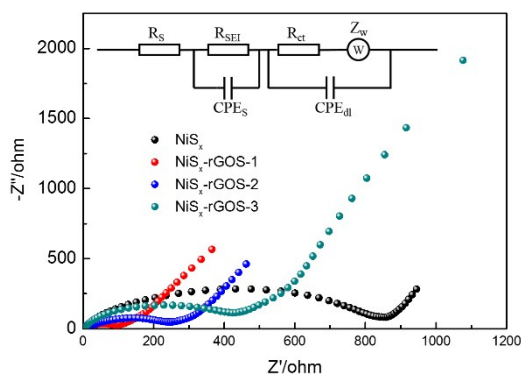

Fig.S11 Nyquist plots of  $\text{NiS}_x$ ,  $\text{NiS}_x\text{-rGOS-1}$ ,  $\text{NiS}_x\text{-rGOS-2}$  and  $\text{NiS}_x\text{-rGOS-3}$ . Inset is the corresponding equivalent circuit model.

Table S2 Fitting results of the Nyquist plots using the equivalent circuit.

| samples                      | $R_S$ ( $\Omega$ ) | $R_{SEI}$ ( $\Omega$ ) | $CPE_S(F)$           | $R_{ct}$ ( $\Omega$ ) | $CPE_{dl}(F)$        | Chi-Squared          |
|------------------------------|--------------------|------------------------|----------------------|-----------------------|----------------------|----------------------|
| $\text{NiS}_x$               | 2.6                | 99.3                   | $7.4 \times 10^{-6}$ | 704.8                 | $7.4 \times 10^{-5}$ | $5.0 \times 10^{-3}$ |
| $\text{NiS}_x\text{-rGOS-1}$ | 3.1                | 5.0                    | $5.1 \times 10^{-6}$ | 84.1                  | $3.7 \times 10^{-5}$ | $2.9 \times 10^{-3}$ |
| $\text{NiS}_x\text{-rGOS-2}$ | 4.3                | 15.0                   | $4.5 \times 10^{-6}$ | 176.3                 | $2.5 \times 10^{-5}$ | $1.3 \times 10^{-3}$ |
| $\text{NiS}_x\text{-rGOS-3}$ | 2.1                | 45.4                   | $3.9 \times 10^{-6}$ | 225.4                 | $5.3 \times 10^{-6}$ | $2.9 \times 10^{-3}$ |

### 13. SEM and TEM images of pristine and cycled electrodes $\text{NiS}_x$ and $\text{NiS}_x\text{-rGOS-1}$

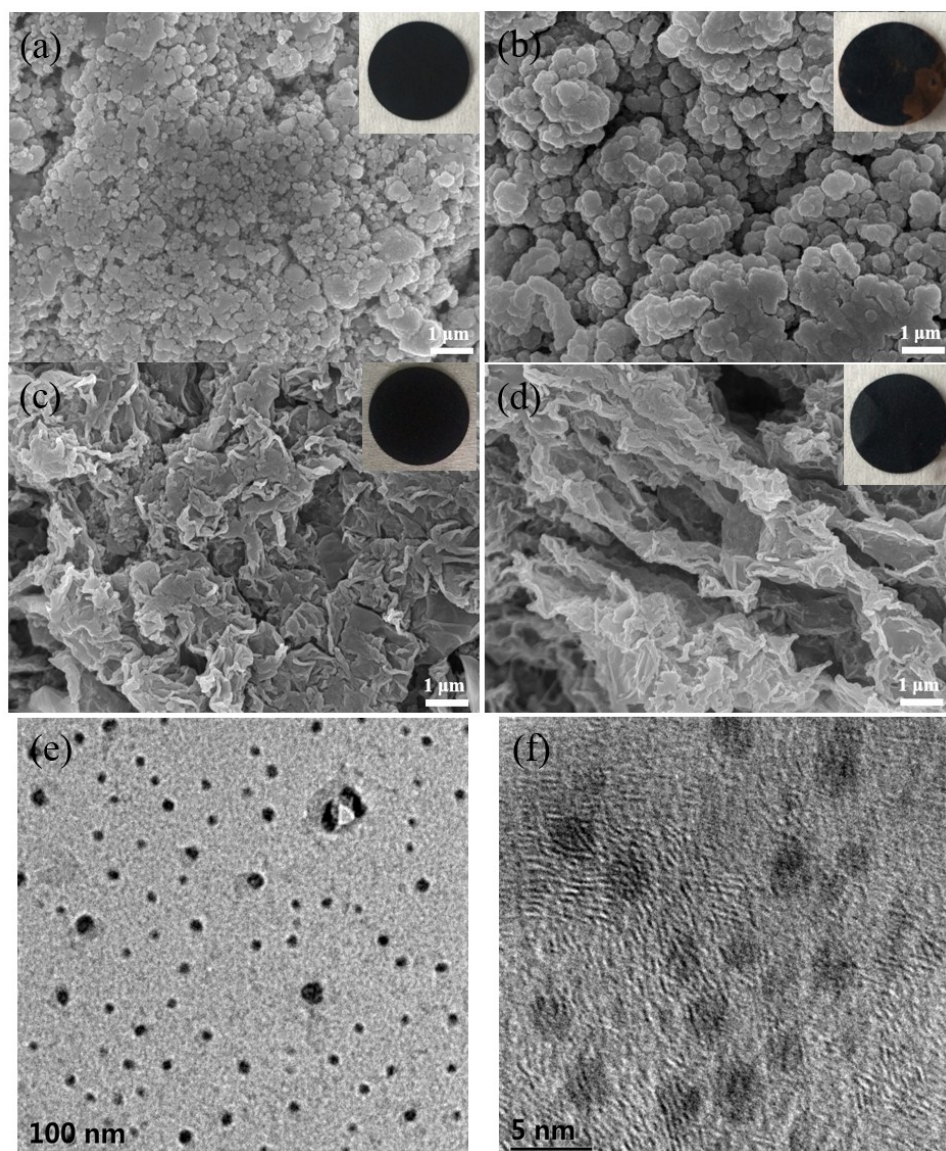

Fig. S12 SEM images of pristine and cycled electrodes (100 cycle) (a-b)  $\text{NiS}_x$ , and (c-d)  $\text{NiS}_x\text{-rGOS-1}$ , (e-f) HRTEM images of  $\text{NiS}_x\text{-rGOS-1}$  electrodes after 100 cycles at  $0.2 \text{ A g}^{-1}$ . Insets: corresponding digital photographs.



#### 14. Comparison of the results in this study with those of previously reported in the literature.

Table S3 comparison of the results in this study with those of previously reported in the literature.

| Anode                                    | Capacity/Current<br>density                                                                                                        | Cycle number/capacity<br>retention | Reference |
|------------------------------------------|------------------------------------------------------------------------------------------------------------------------------------|------------------------------------|-----------|
| NiS <sub>x</sub> -rGOS                   | 515 mA h g <sup>-1</sup> /0.2 A g <sup>-1</sup><br>414 mA h g <sup>-1</sup> /4 A g <sup>-1</sup>                                   | 100/96.8%                          | This work |
| Nano hollow NiS <sub>x</sub> -rGO        | 504 mA h g <sup>-1</sup> /0.2 A g <sup>-1</sup><br>377 mA h g <sup>-1</sup> /3 A g <sup>-1</sup>                                   | 150/100%                           | [1]       |
| hierarchical hollow α-NiS spheres        | 499.9 mA h g <sup>-1</sup> /0.1 A g <sup>-1</sup><br>337.4 mA h g <sup>-1</sup> /5 A g <sup>-1</sup>                               | 50/73%                             | [2]       |
| Nickel sulphide-RGO composites           | 513 mA h g <sup>-1</sup> /0.1 A g <sup>-1</sup><br>346 mA h g <sup>-1</sup> /1 A g <sup>-1</sup>                                   | 50/88.4%                           | [3]       |
| NiS <sub>x</sub> /CNT@C                  | 406 mA h g <sup>-1</sup> /0.2 A g <sup>-1</sup><br>143 mA h g <sup>-1</sup> /5 A g <sup>-1</sup><br>382 mA h g <sup>-1</sup> /0.1C | 200/85%                            | [4]       |
| NiS <sub>2</sub> -GNS                    | 168 mA h g <sup>-1</sup><br><sup>1</sup> /2C(1C=807 mA g <sup>-1</sup> )                                                           | 200/77%                            | [5]       |
| Ni <sub>3</sub> S <sub>2</sub> /Ni       | 315.3 mA h g <sup>-1</sup> /0.05 A g <sup>-1</sup>                                                                                 | 100/90.6%                          | [6]       |
| Ni <sub>3</sub> S <sub>2</sub> -PEDOT    | 600 mA h g <sup>-1</sup> /0.15 A g <sup>-1</sup><br>310 mA h g <sup>-1</sup> /1.2 A g <sup>-1</sup>                                | 50/60%                             | [7]       |
| CNT@NiS/C                                | 600 mA h g <sup>-1</sup> /0.1 A g <sup>-1</sup>                                                                                    | 100/98%                            | [8]       |
| Ni <sub>3</sub> S <sub>2</sub> /graphene | 284 mA h g <sup>-1</sup> /0.6 A g <sup>-1</sup>                                                                                    | 110/71.1%                          | [9]       |



1. Park, G.D., J.S. Cho, and Y.C. Kang, *Sodium-ion storage properties of nickel sulfide hollow nanospheres/reduced graphene oxide composite powders prepared by a spray drying process and the nanoscale Kirkendall effect*. *Nanoscale*, 2015. **7**(40): p. 16781-8.
2. Zhang, D., et al., *Engineering Hierarchical Hollow Nickel Sulfide Spheres for High-Performance Sodium Storage*. *Advanced Functional Materials*, 2016.
3. Qin, W., et al., *Layered nickel sulfide-reduced graphene oxide composites synthesized via microwave-assisted method as high performance anode materials of sodium-ion batteries*. *Journal of Power Sources*, 2016. **302**: p. 202-209.
4. Zhao, F., et al., *Stabilizing nickel sulfide nanoparticles with an ultrathin carbon layer for improved cycling performance in sodium ion batteries*. *Nano Research*, 2016. **9**(10): p. 3162-3170.
5. Wang, T., et al., *Nickel Disulfide-Graphene Nanosheets Composites with Improved Electrochemical Performance for Sodium Ion Battery*. *ACS Appl Mater Interfaces*, 2016. **8**(12): p. 7811-7.
6. Song, X., et al., *Morphology-dependent performance of nanostructured Ni<sub>3</sub>S<sub>2</sub>/Ni anode electrodes for high performance sodium ion batteries*. *Nano Energy*, 2016. **26**: p. 533-540.
7. Shang, C., et al., *A Ni<sub>3</sub>S<sub>2</sub>-PEDOT monolithic electrode for sodium batteries*. *Electrochemistry Communications*, 2015. **50**: p. 24-27.
8. Han, F., C.Y.J. Tan, and Z. Gao, *A Dual-Carbon Phase-Modified and Nanostructured Nickel Sulfide Anode for Sodium-Ion Batteries*. *Energy Technology*, 2017.
9. Xia, X., et al., *Wrinkled Graphene-Reinforced Nickel Sulfide Thin Film as High-Performance Binder-Free Anode for Sodium-Ion Battery*. *Journal of Materials Science & Technology*, 2016.
